# Supplementary material for: Antitumor Effects of Ursolic Acid through Mediating the Inhibition of STAT3/PD-L1 Signaling in Non-Small Cell Lung Cancer Cells
Source: PubMed Central journal article supplement (PMC7998465; doi:10.3390/biomedicines9030297), 2021-03-13
Supplement: biomedicines-09-00297-s001.pdf [file biomedicines-09-00297-s001.pdf]

| Sl No | Gene                      | Annealing temperature (°C) | Sequence (5' - 3')                                             |
|-------|---------------------------|----------------------------|----------------------------------------------------------------|
| 1     | <i>CCND1</i>              | 58                         | F: 5'-tgtttgaagcaggactttg-3'<br>R: 5'-tcacctggcaatgtgagaa-3'   |
| 2     | <i>CCNE1</i>              | 58                         | F: 5'-atcctcaaagttgcaccag-3'<br>R: 5'-aggggacttaaagccactt-3'   |
| 3     | <i>CDK4</i>               | 58                         | F: 5'-cccgaagtcttctgcagtc-3'<br>R: 5'-ctggtcggcttcagagt-3'     |
| 4     | <i>CDKN1A</i>             | 58                         | F: 5'-atgaaattcaccccccttcc-3'<br>R: 5'-aggtgaggggactccaaagt-3' |
| 5     | <i>CDKN1B</i>             | 58                         | F: 5'-ccggctaactctgaggacac-3'<br>R: 5'-ttgcaggtcgcttccttatt-3' |
| 6     | <i>MMP2</i>               | 58                         | F: 5'-tgatggcatcgctcagatcc-3'<br>R: 5'-ggcctgtataaccgatcaa-3'  |
| 7     | <i>MMP3</i>               | 58                         | F: 5'-cacagacctgactcgggtcc-3'<br>R: 5'-agggtctggaggacaggtt-3'  |
| 8     | <i>MMP9</i>               | 58                         | F: 5'-ggacaagctcttcggcttct-3'<br>R: 5'-tcgctggtacaggtcgagta-3' |
| 9     | <i>VEGF</i>               | 58                         | F: 5'-aggagggcagaatcatcacg-3'<br>R: 5'-caaggccccacaggatttct-3' |
| 10    | <i>PD-L1</i>              | 58                         | F: 5'-tgccaggcattgaatctaca-3'<br>R: 5'-ggcctatttctctcttgg-3'   |
| 10    | <i>GAPDH</i>              | 58                         | F: 5'-cccactctccaccttgac-3'<br>R: 5'-tcctcttgctcttgg-3'        |
| 11    | <i>MMP2</i> (ChIP assay)  | 58                         | F: 5'-tgcaggagcttgccttctgt-3'<br>R: 5'-gcttgggtgcaatccactg-3'  |
| 12    | <i>PD-L1</i> (ChIP assay) | 58                         | F: 5'-cccagctgcagcatctaagt-3'<br>R: 5'-aggccaaggtaatgtgtct-3'  |

**Table S1. q-PCR primer sequences and annealing temperature.**
